# Supplementary material for: Tailoring the ORR selectivity for H2O2 electrogeneration by modification of Printex L6 carbon with 1,4-naphthoquinone: a theoretical, experimental and environmental application study
Source: Royal Society of Chemistry journal article supplement (doi:10.1039/d0ma00290a), 2020-01-01
Supplement: d0ma00290a1.pdf [file d0ma00290a1.pdf]

**SUPPLEMENTARY INFORMATION**

**Table S1.** Properties of carbon-based materials modified with catalytic organic compounds for ORR towards H<sub>2</sub>O<sub>2</sub> production.

| <i>Matrix</i>                | <i>Modifier</i>                     | <i>Eleetrolyte</i>                                                           | <i>%<br/>(w/w)<sup>a</sup></i>                                                           | <i>ΔE<sub>1/2</sub><br/>(mV)<sup>b</sup></i> | <i>%H<sub>2</sub>O<sub>2</sub></i> | <i>Ref.</i> |
|------------------------------|-------------------------------------|------------------------------------------------------------------------------|------------------------------------------------------------------------------------------|----------------------------------------------|------------------------------------|-------------|
| <b>PL6C</b>                  | Sudan Red 7B                        | 0.1 M K <sub>2</sub> SO <sub>4</sub>                                         | 0.5                                                                                      | ~50                                          | 86.2                               | 1           |
|                              | methyl-p-benzoquinone               | “                                                                            | 0.5                                                                                      | ~20                                          | 85.5                               | 1           |
|                              | anthraflavic acid                   | “                                                                            | 0.5                                                                                      | ~10                                          | 83.3                               | 1           |
|                              | anthraquinone-2-<br>carboxylic acid | “                                                                            | 2.0                                                                                      | ~0                                           | 83.8                               | 1           |
|                              | tert-butyl-anthraquinone            | 0.1 M K <sub>2</sub> SO <sub>4</sub><br>0.1 M H <sub>2</sub> SO <sub>4</sub> | 1.0                                                                                      | ~50                                          | 89.6                               | 2           |
|                              | 1,2-<br>dihydroxyanthraquinone      | “                                                                            | 1.0                                                                                      | ~0                                           | 95.0                               | 3           |
|                              | 2-methyl-1,4-<br>naphthoquinone     | “                                                                            | 0.5                                                                                      | ~80                                          | 75.0                               | 3           |
|                              | acenaphthylene-1,2-<br>dione        | “                                                                            | 1.0                                                                                      | ~20                                          | 84.0                               | 3           |
|                              | 2-ethylanthraquinone                | “                                                                            | 10                                                                                       | ~400                                         | *                                  | 4           |
|                              | <b>GC</b>                           | Azobenzene                                                                   | 0.1 M K <sub>2</sub> SO <sub>4</sub><br>0.1 M H <sub>2</sub> SO <sub>4</sub><br>(pH 1.0) | 10                                           | ~300                               | *           |
| Antraquinone                 |                                     | 0.1 M KOH                                                                    | *                                                                                        | ~15                                          | 95-100                             | 6           |
| 2,6-<br>diaminoanthraquinone |                                     | 0,2 M NaCl                                                                   | 2.6                                                                                      | ~380                                         | *                                  | 7           |
| <b>GRA</b>                   | 5-hydroxy-1,4-<br>naphthoquinone    | 0.5 M CHCOONa                                                                | *                                                                                        | ~160                                         | *                                  | 8           |

**a-** Percentage of the modifier into the matrix in the weight / weight ratio

**b-** The values are calculated versus the reduction potential of unmodified electrode

\*- Unspecified values

**Table S2.** Experimental and theoretical values of dipole moment (in Debye, D) for 1,4-naphthoquinone in benzene, using B3LYP, CAM-B3LYP, different basis sets and C-PCM method

| B3LYP           | Experimental Dipole Moment = 1.21 D |             |
|-----------------|-------------------------------------|-------------|
| Basis set       | B3LYP                               | CAM-B3LYP   |
| 6-311G          | 1.82                                | 1.69        |
| 6-311++G        | 1.97                                | 1.83        |
| 6-311G(2d,2p)   | 1.53                                | <b>1.42</b> |
| 6-311G(3d,3p)   | 1.54                                | 1.43        |
| 6-311++G(2d,2p) | 1.70                                | 1.60        |
| 6-311++G(3d,3p) | 1.68                                | 1.58        |
| cc-pvqz         | 1.65                                | 1.54        |
| cc-pvtz         | 1.60                                | 1.50        |
| def2-TZVPD      | 1.69                                | 1.57        |

**Table S3.** Values of Laplacian of electron density ( $\nabla^2\rho$ ) for the hydrogen bonds in structures 1 and 2

|                    | BCPs      | $\nabla^2\rho$ (a.u.) |
|--------------------|-----------|-----------------------|
| <b>Structure 1</b> | H67 – O68 | 0.04                  |
| <b>Structure 2</b> | H85 – O79 | 0.16                  |
| <b>Structure 3</b> | H87 – O77 | 0.03                  |

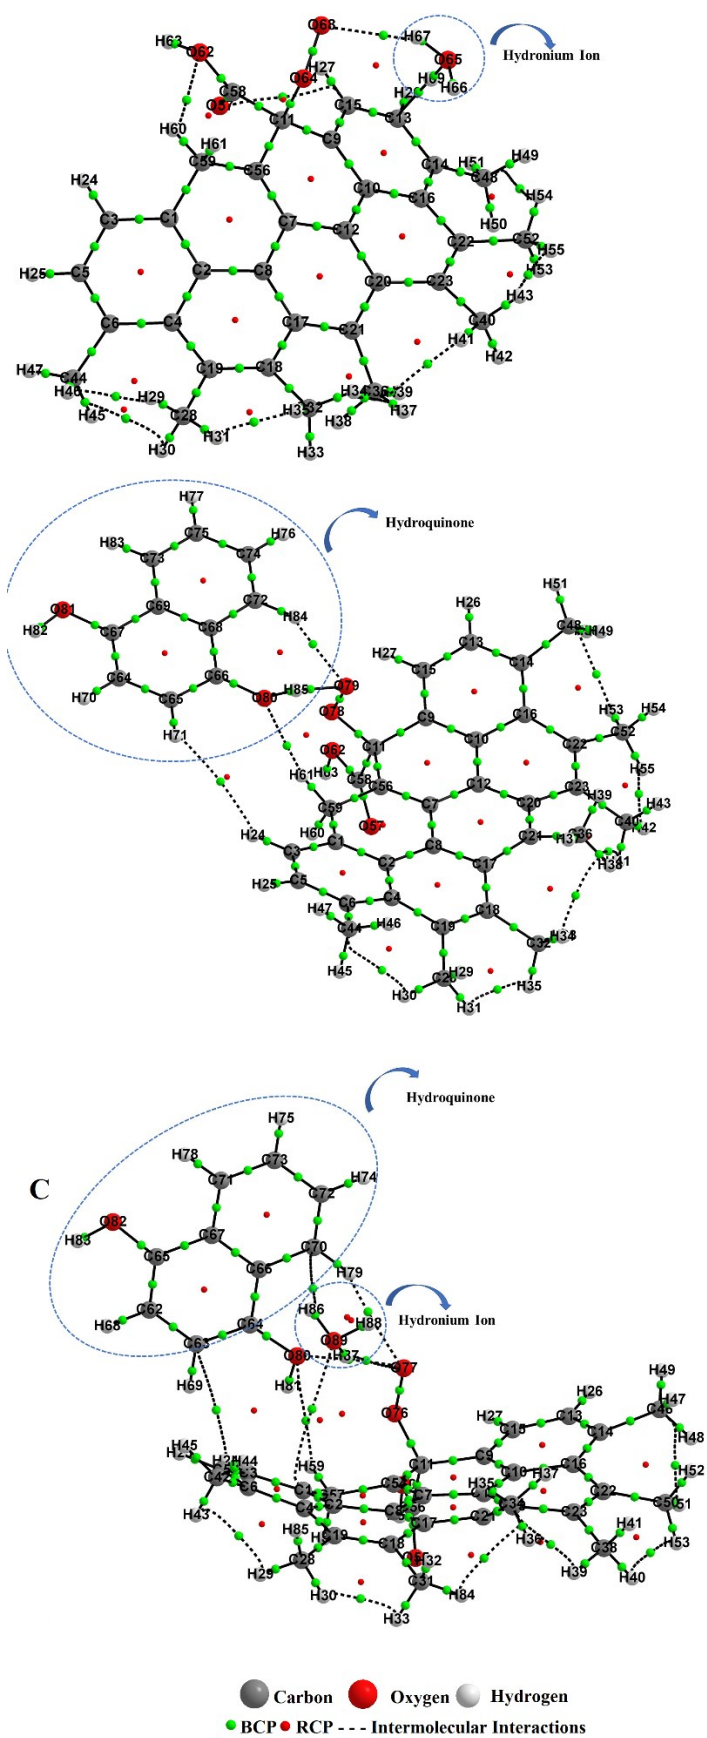

**Figure S1.** BCPs related to the Laplacian of electron density ( $\nabla^2\rho$ ) for structures 1 (A), 2 (B) and 3 (C).

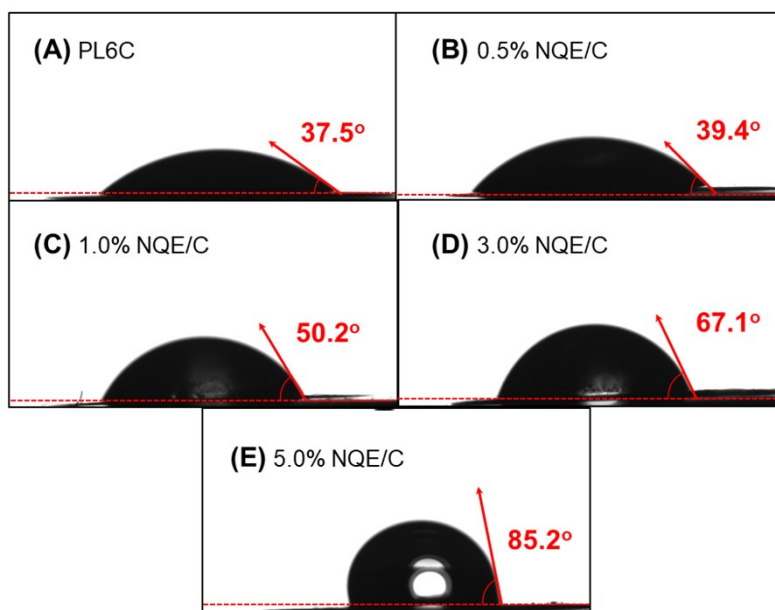

**Figure S2.** Pictures and contact angle measurements of a 3  $\mu\text{L}$  ultrapure water drop on microlayers of PL6C (A), 0.5% NQE/C (B), 1.0% NQE/C (C), 3.0% NQE/C (D) e 5.0% NQE/C (E).

**Table S4.** Kinetic velocity of  $\text{H}_2\text{O}_2$  electrogeneration from ORR in acid medium under the different current densities investigated

| $k_{\text{app}}$ values ( $\text{mg L}^{-1} \text{min}^{-1}$ ) |                           |                           |                           |                           |                            |                            |
|----------------------------------------------------------------|---------------------------|---------------------------|---------------------------|---------------------------|----------------------------|----------------------------|
| Current density                                                | 10<br>$\text{mA cm}^{-2}$ | 25<br>$\text{mA cm}^{-2}$ | 50<br>$\text{mA cm}^{-2}$ | 75<br>$\text{mA cm}^{-2}$ | 100<br>$\text{mA cm}^{-2}$ | 150<br>$\text{mA cm}^{-2}$ |
| PL6C                                                           | 0.595                     | 1.410                     | 3.419                     | 4.477                     | 4.595                      | 4.426                      |
| 1.0% NQE/C                                                     | 0.657                     | 1.514                     | 4.126                     | 5.302                     | 4.871                      | 4.944                      |

| Advanced Oxidative Process      | $k_{\text{app}}$ ( $\text{min}^{-1}$ )<br>1.0% NQE-GDE | $R^2$ Curve |
|---------------------------------|--------------------------------------------------------|-------------|
| UVC                             | $0.3 \times 10^{-3}$                                   | 0.9973      |
| AO                              | $6.6 \times 10^{-3}$                                   | 0.9887      |
| AO- $\text{H}_2\text{O}_2$      | $8.1 \times 10^{-3}$                                   | 0.9909      |
| AO- $\text{H}_2\text{O}_2$ /UVC | $8.3 \times 10^{-3}$                                   | 0.9896      |
| EF                              | $11.4 \times 10^{-3}$                                  | 0.9709      |
| PEF                             | $16.4 \times 10^{-3}$                                  | 0.9761      |

**Table S5.** Kinetic constant of PRM degradation calculated based on the different AOP applied in acid medium at  $j=75 \text{ mA cm}^{-2}$ .

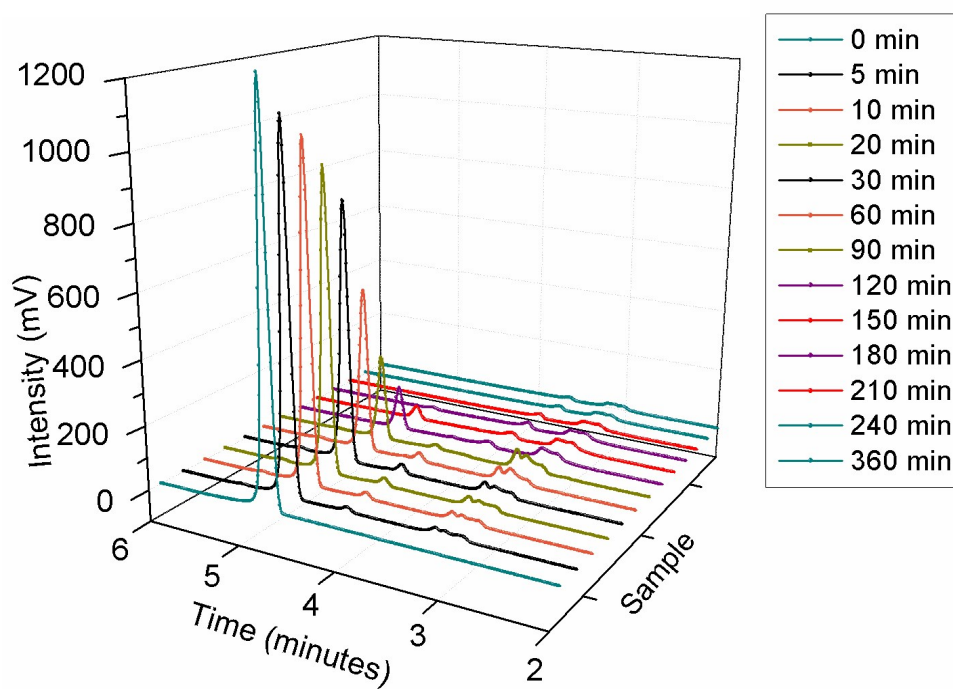

**Figure S3.** PRM chromatographic peaks related to 6 h of PEF degradation process conducted on 1.0 % NQE modified GDE using  $0.1 \text{ mol L}^{-1} \text{ K}_2\text{SO}_4$  under pH 2, with UVC light and  $0.15 \text{ mmol L}^{-1}$  of  $\text{Fe}^{2+}$ .

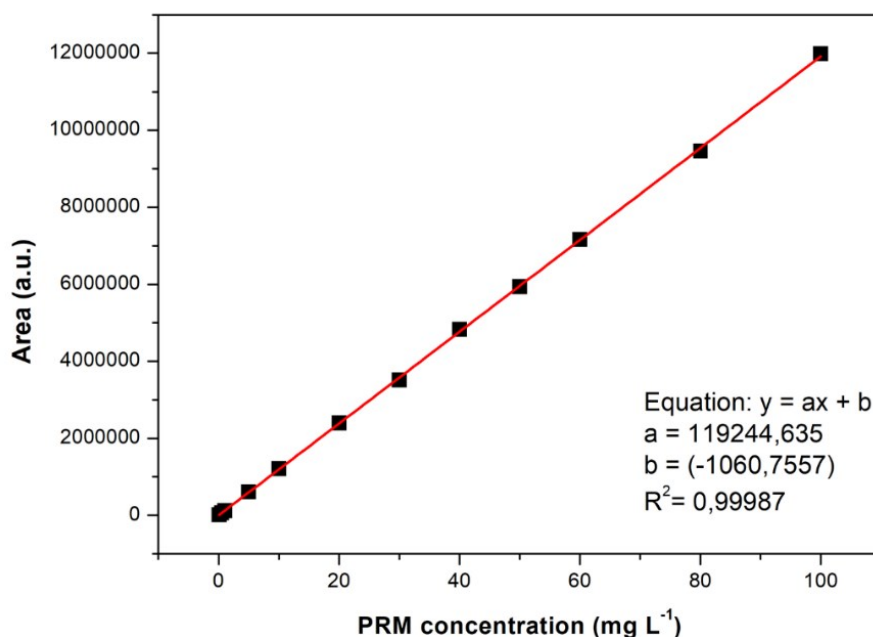

**Figure S4.** Paracetamol analytical curve developed by HPLC-UV using the external standard method in the concentration range of 0.5 to 100 mg L<sup>-1</sup>.

## References

- 1 J. Moreira, V. Bocalon Lima, L. Athie Goulart and M. R. V. Lanza, *Appl. Catal. B Environ.*, 2019, **248**, 95–107.
- 2 R. B. Valim, R. M. Reis, P. S. Castro, A. S. Lima, R. S. Rocha, M. Bertotti and M. R. V Lanza, *Carbon N. Y.*, 2013, **61**, 236–244.
- 3 R. S. Rocha, R. B. Valim, L. C. Trevelin, J. R. Steter, J. F. Carneiro, J. C. Forti, R. Bertazzoli and M. R. V. Lanza, *Electrocatalysis*, 2020, **11**, 338–346.
- 4 J. C. Forti, R. S. Rocha, M. R. V. Lanza and R. Bertazzoli, *J. Electroanal. Chem.*, 2007, **601**, 63–67.
- 5 J. C. Forti, J. A. Nunes, M. R. V. Lanza and R. Bertazzoli, *J. Appl. Electrochem.*, 2007, **37**, 527–532.
- 6 A. Sarapuu, K. Vaik, D. J. Schiffrin and K. Tammeveski, *J. Electroanal. Chem.*, 2003, **541**, 23–29.
- 7 L. Roullier, E. Waldner and E. Laviron, *J. Electroanal. Chem.*, 1985, **191**, 59–73.
- 8 M. C. Pham and J. E. Dubois, *J. Electroanal. Chem.*, 1986, **199**, 153–164.
